# Supplementary material for: Droplets as Carriers for Flexible Electronic Devices
Source: PubMed Central journal article supplement (PMC6918117; doi:10.1002/advs.201901862), 2019-10-30
Supplement: ADVS-6-1901862-s001.pdf [file ADVS-6-1901862-s001.pdf]

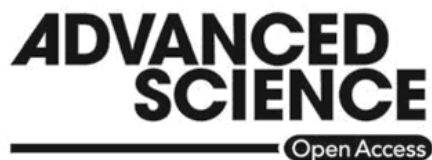

## Supporting Information

for *Adv. Sci.*, DOI: 10.1002/advs.201901862

Droplets as Carriers for Flexible Electronic Devices

*Mingxing Zhou, Ziyue Wu, Yicong Zhao, Qing Yang, Wei Ling, Ya Li, Hang Xu, Cheng Wang, and Xian Huang\**

Copyright WILEY-VCH Verlag GmbH & Co. KGaA, 69469 Weinheim, Germany,  
2019.

## Supporting Information

### Droplets as carriers for flexible electronic devices

*Mingxing Zhou, Ziyue Wu, Yicong Zhao, Qing Yang, Wei Lin, Ya Li, Hang Xu, Cheng Wang, Xian Huang\**

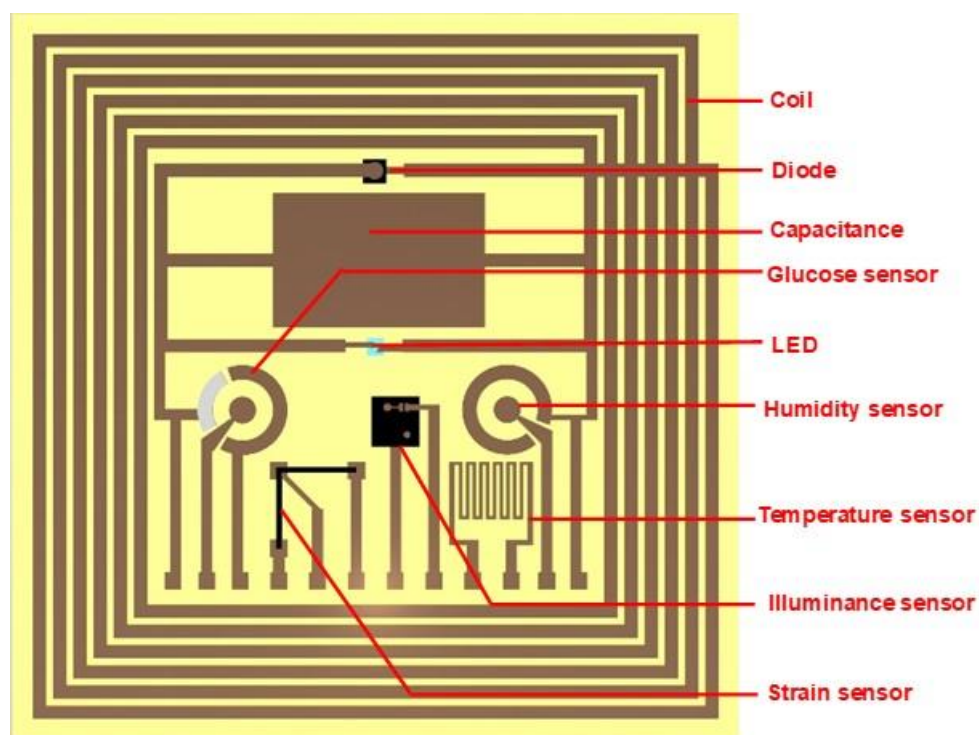

**Figure S1.** A diagram of the conceptual flexible device.

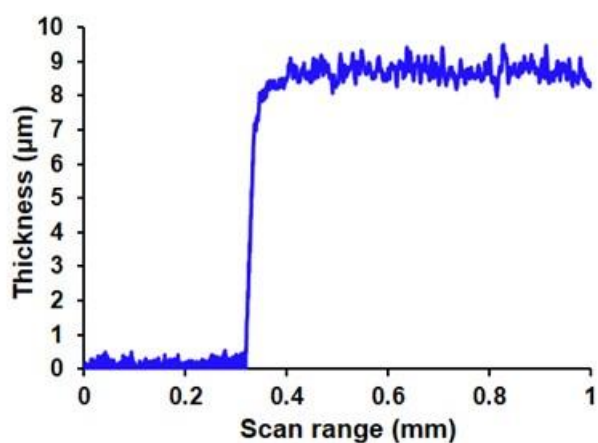

**Figure S2.** Thickness of a flexible electronics device.

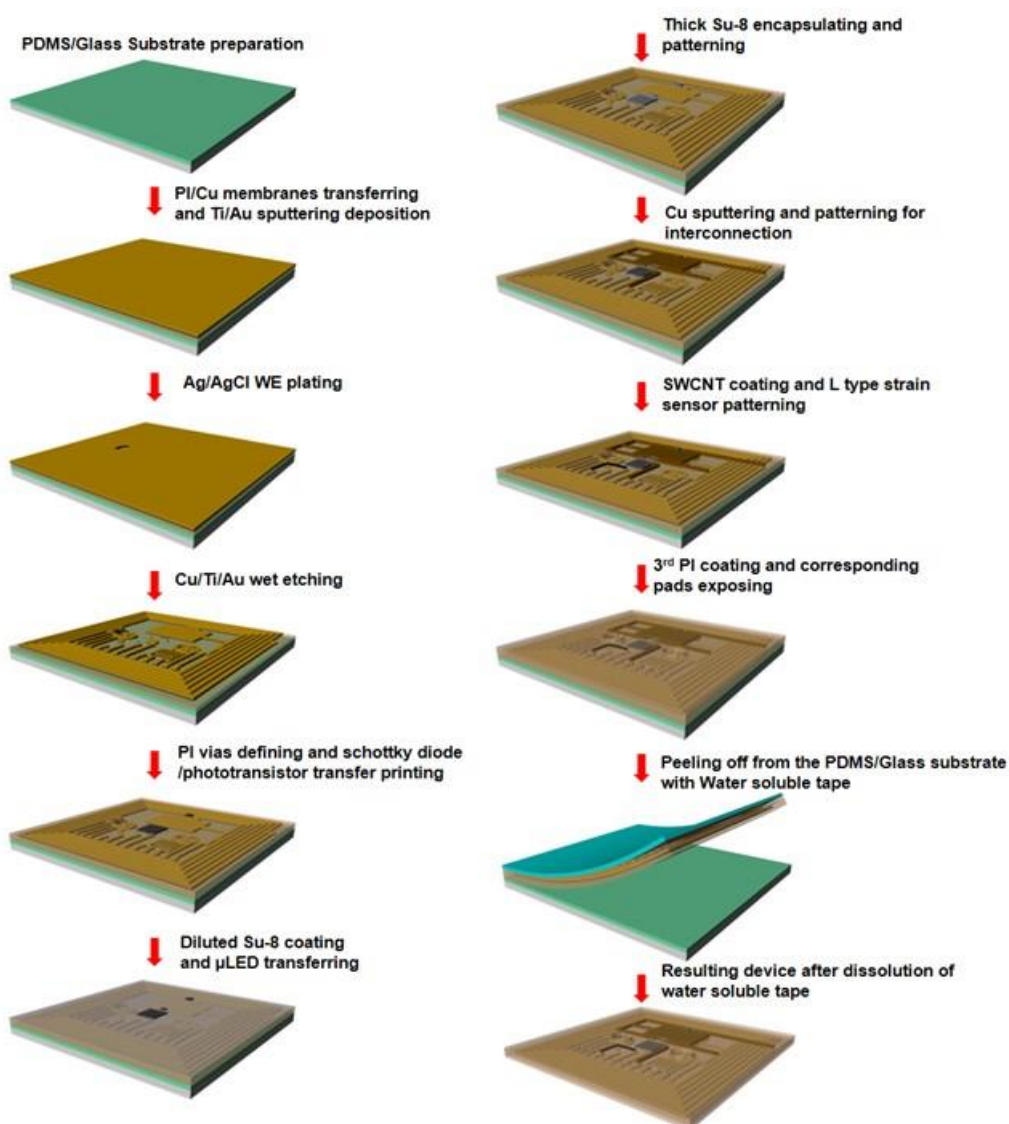

**Figure S3.** A fabrication process of the flexible device for active droplets.

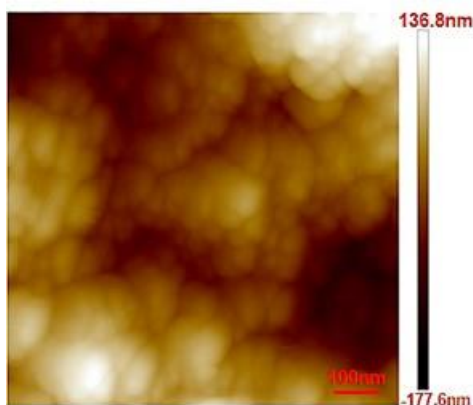

**Figure S4.** An atomic force microscopic image of nanostructures on the superhydrophobic surface.

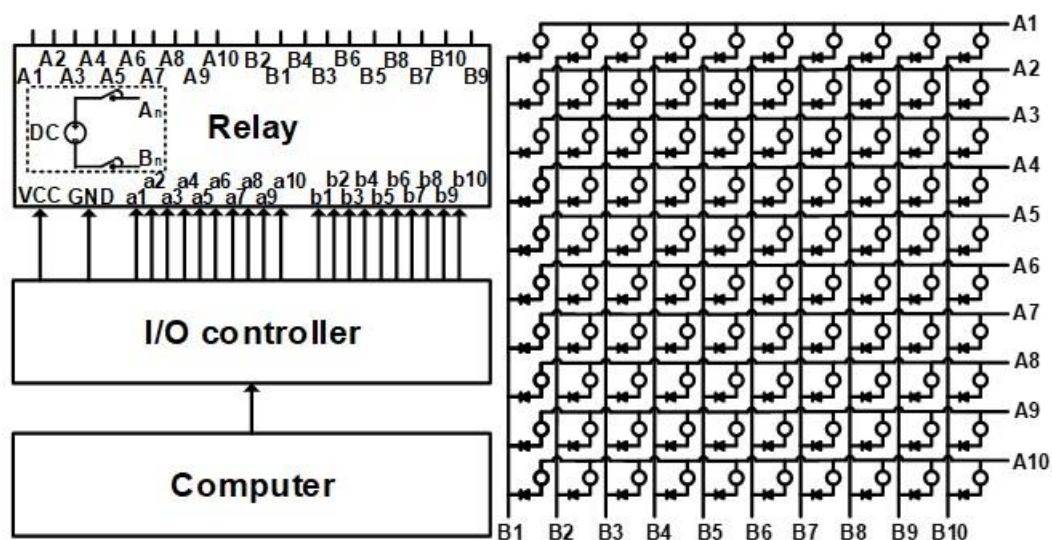

**Figure S5.** A schematic of the driving circuit for the electromagnetic platform.

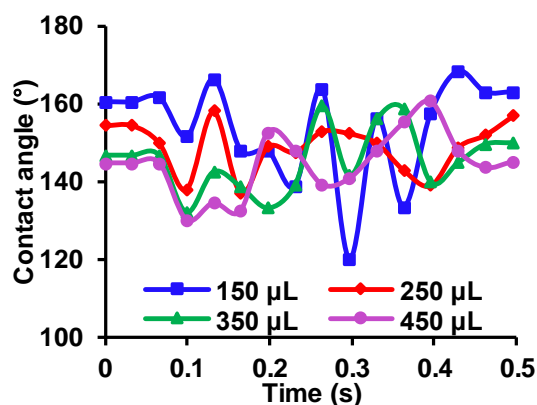

**Figure S6.** Advancing contact angles of four droplets with varied volumes during a motion process from one electromagnet to the neighboring electromagnet.

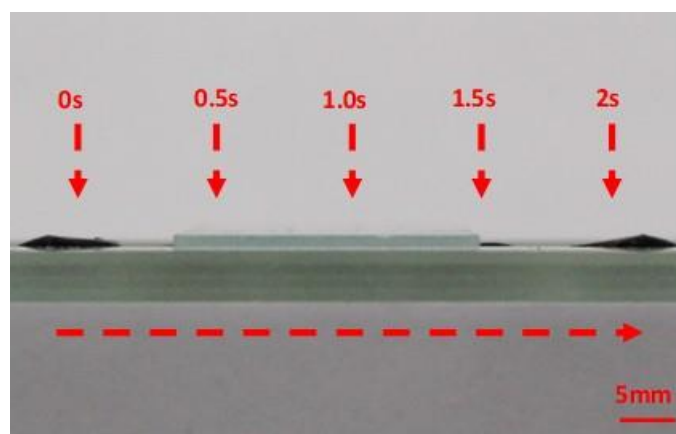

**Figure S7.** Demonstration of droplet motion. A droplet moves through a narrow horizontal channel and performs reversible shape change.

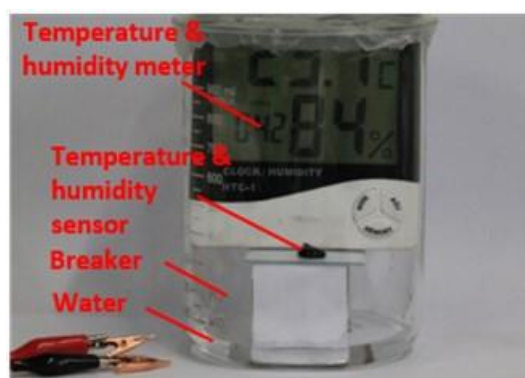

**Figure S8.** An experimental setup to monitor changes in humidity and temperature.
